# Supplementary material
Source: PubMed Central journal article supplement (PMC3375611)
Supplement: NIHMS375719-supplement-Supplementary_Online_Materials.pdf [file NIHMS375719-supplement-Supplementary_Online_Materials.pdf]

## Supplementary Online Materials

for

### Fusion Partner Toolchest for the Stabilization and Crystallization of G Protein-Coupled Receptors

Eugene Chun<sup>1#</sup>, Aaron A. Thompson<sup>1#</sup>, Wei Liu<sup>1#</sup>, Christopher B. Roth<sup>2</sup>, Mark T. Griffith<sup>2</sup>,  
Vsevolod Katritch<sup>1</sup>, Joshua Kunken<sup>1</sup>, Fei Xu<sup>1</sup>, Vadim Cherezov<sup>1</sup>, Michael A. Hanson<sup>2\*</sup>,  
Raymond C. Stevens<sup>1\*</sup>

<sup>1</sup>Department of Molecular Biology, The Scripps Research Institute, 10550 North Torrey Pines  
Road, La Jolla, CA 92037, USA

<sup>2</sup>Receptos, 10835 Road to the Cure, Suite #205, San Diego, CA 92121, USA

# These authors contributed equally to this work

\*Address for correspondence: [mhanson@receptos.com](mailto:mhanson@receptos.com); [stevens@scripps.edu](mailto:stevens@scripps.edu)

## **Inventory**

**Table S1** is an example table of PDB screen results from which the domains shown in figure 1 were selected.

**Figure S1** shows that the multiple receptor bands can be consolidated with the addition of PNGaseF and reducing agent using A<sub>2A</sub>AR-BRIL (construct 16) and β<sub>2</sub>AR-BRIL (construct 24) as representative examples.

**Figure S2** shows complementary FRAP data that was used to guide the crystallization trials in figure 6.

**Table S1. PDB search results for potential GPCR fusion partners, related to figure 1. PDB**

entry results as determined by the search criteria in the main text. PDB entries are sorted by resolution.

| No | PDB ID | PDB HEAD                              | Res  | Bfactor | Heteroatoms        | Swiss ID     | Charge | Mass  | Dist (NC) |
|----|--------|---------------------------------------|------|---------|--------------------|--------------|--------|-------|-----------|
| 1  | 2dsx   | ELECTRON TRANSPORT                    | 0.68 | 7.5     | FE                 | RUBR_DESGI   | -6.    | 5342  | 11.2      |
| 2  | 1w0n   | HYDROLASE                             | 0.8  | 8.6     | CA,MG,SO4          | XYND_PAEPO   | -5.    | 12470 | 7.8       |
| 3  | 2o7a   | HYDROLASE                             | 0.84 | 6.2     | ACT,CL,SME         | LYS_BPT4     | 4.     | 15914 | 10.1      |
| 4  | 1rb9   | IRON-SULFUR PROTEIN                   | 0.92 | 9.2     | FE2,FME,SO4        | RUBR_DESVH   | -6.    | 6354  | 10.7      |
| 5  | 2fdn   | ELECTRON TRANSPORT                    | 0.94 | 8.5     | SF4                | FER_CLOAC    | -8.    | 6450  | 5.8       |
| 6  | 2xom   | HYDROLASE                             | 0.95 | 7.8     |                    |              | -3.    | 16791 | 9.1       |
| 7  | 2xod   | FLAVOPROTEIN                          | 0.96 | 12.9    |                    |              | -4.    | 13415 | 10.1      |
| 8  | 3fsa   | METAL BINDING PROTEIN                 | 0.98 | 7.8     | CU1                | AZUR_PSEAE   | -3.    | 13109 | 10.7      |
| 9  | 2zpm   | Hydrolase                             | 0.98 | 10.9    | MLY,MSE            | RSEP_ECOLI   | -5.    | 9688  | 12.1      |
| 10 | 2gkg   | SIGNALING PROTEIN                     | 1.   | 10.6    |                    |              | -3.    | 14981 | 9.1       |
| 11 | 2qsk   | SUGAR BINDING PROTEIN                 | 1.   | 11.3    | CL,GOL             | SVN_SCYVA    | 4.     | 9861  | 5.6       |
| 12 | 1c7k   | HYDROLASE                             | 1.   | 12.     | CA,ZN              | SNPA_STRCS   | -5.    | 13450 | 7.6       |
| 13 | 1nkd   | TRANSCRIPTION REGULATION              | 1.09 | 16.4    |                    | ROP_ECOLX    | -4.    | 7253  | 6.2       |
| 14 | 2nwf   | OXIDOREDUCTASE                        | 1.1  | 7.9     | FES,GOL            | UCRI_RHOSH   | -5.    | 15970 | 9         |
| 15 | 2aqm   | OXIDOREDUCTASE                        | 1.1  | 9.6     | CU1,GOL,SO4,ZN     | SODC_BRUAB   | -5.    | 15422 | 12.8      |
| 16 | 2rhf   | HYDROLASE                             | 1.1  | 13.2    | MSE,PO4            |              | -4.    | 7878  | 10        |
| 17 | 2ccw   | ELECTRON TRANSPORT (CUPROPROTEIN)     | 1.13 | 17.1    | CU1                | AZUR2_ALCX X | 0.     | 13759 | 9.5       |
| 18 | 3tbn   | METAL BINDING PROTEIN                 | 1.15 | 12.1    |                    |              | 4.     | 9187  | 10.9      |
| 19 | 2xfd   | SUGAR BINDING PROTEIN                 | 1.19 | 7.6     |                    |              | -3.    | 10961 | 7.7       |
| 20 | 2h8e   | HYDROLASE                             | 1.2  | 12.9    |                    | RUSA_ECOLI   | 6.     | 12850 | 12.3      |
| 21 | 1usm   | TRANSCRIPTIONAL STIMULATOR            | 1.2  | 15.1    |                    |              | 0.     | 8698  | 13.3      |
| 22 | 2yh5   | LIPID BINDING PROTEIN                 | 1.25 | 16.8    |                    |              | -5.    | 12558 | 11.8      |
| 23 | 1jni   | OXIDOREDUCTASE                        | 1.25 | 22.8    | HEM                | NAPB_HAEIN   | 4.     | 6338  | 12.5      |
| 24 | 1rtt   | Structural genomics, unknown function | 1.28 | 11.6    | SO4                |              | -2.    | 17487 | 10        |
| 25 | 1zce   | STRUCTURAL GENOMICS, UNKNOWN FUNCTION | 1.3  | 9.3     | MSE                |              | -4.    | 15706 | 4.7       |
| 26 | 3nbm   | TRANSFERASE                           | 1.3  | 10.5    |                    |              | 0.     | 11518 | 14        |
| 27 | 2ehs   | LIPID TRANSPORT                       | 1.3  | 13.9    | NA,ZN              | ACP_AQUAE    | -14.   | 7885  | 12.1      |
| 28 | 1vmh   | UNKNOWN FUNCTION                      | 1.31 | 17.     | NA                 |              | -4.    | 13332 | 9.8       |
| 29 | 1oh4   | HYDROLASE                             | 1.35 | 12.5    | BMA,CA,GLA,GOL,SO4 |              | -6.    | 18776 | 7.6       |
| 30 | 2ip6   | ANTIMICROBIAL PROTEIN                 | 1.35 | 13.6    | SO4                |              | -1.    | 9202  | 12.9      |
| 31 | 2wds   | TRANSFERASE                           | 1.35 | 14.8    |                    | ACPS_STRCO   | -2.    | 12128 | 4.6       |
| 32 | 1wck   | STRUCTURAL PROTEIN                    | 1.36 | 14.7    | CAC                |              | -5.    | 12798 | 14.9      |
| 33 | 2nuh   | UNKNOWN FUNCTION                      | 1.39 | 16.4    | IMD                |              | -3.    | 10811 | 14.8      |
| 34 | 2fi1   | HYDROLASE                             | 1.4  | 12.3    | CA                 |              | -14.   | 19652 | 8.3       |
| 35 | 3bzq   | SIGNALING PROTEIN/ TRANSCRIPTION      | 1.4  | 13.9    |                    | GLNB_MYCTU   | -1.    | 9782  | 13.3      |
| 36 | 2z98   | Oxidoreductase                        | 1.4  | 17.     | EDO,FMN            | AZOR_ECOLI   | -6.    | 19394 | 14.5      |
| 37 | 2y39   | METAL BINDING PROTEIN                 | 1.41 | 13.5    |                    |              | -4.    | 11731 | 6.2       |
| 38 | 1mb3   | SIGNALING PROTEIN, CELL CYCLE         | 1.41 | 15.3    | MG                 |              | -9.    | 12344 | 14.9      |
| 39 | 3by8   | TRANSFERASE                           | 1.45 | 22.3    | MLT                | DCUS_ECOLI   | 0.     | 15150 | 12.4      |

| No | PDB ID | PDB HEAD                              | Res       | Bfactor | Heteroatoms | Swiss ID    | Charge | Mass  | Dist (NC) |
|----|--------|---------------------------------------|-----------|---------|-------------|-------------|--------|-------|-----------|
| 40 | 3i7m   | HYDROLASE                             | 1.46      | 14.1    | MSE         |             | -10.   | 15812 | 11.4      |
| 41 | 3a0s   | Transferase                           | 1.47      | 24.8    | PEG,PG4,PGE |             | -1.    | 10791 | 5.5       |
| 42 | 2j1a   | HYDROLASE                             | 1.49      | 20.7    | CA,GAL      | OGA_CLOPE   | -7.    | 14467 | 7.6       |
| 43 | 3kyz   | TRANSFERASE                           | 1.49<br>7 | 19.3    | CL,FMT,MSE  | PFES_PSEAE  | -4.    | 12734 | 4.8       |
| 44 | 3akb   | METAL BINDING PROTEIN                 | 1.5       | 13.5    |             |             | -8.    | 16492 | 9.5       |
| 45 | 2vmh   | SUGAR-BINDING PROTEIN                 | 1.5       | 15.2    | CA          |             | -13.   | 14767 | 11.3      |
| 46 | 2wz8   | SUGAR BINDING PROTEIN                 | 1.5       | 15.5    |             |             | -1.    | 14055 | 6.8       |
| 47 | 3po8   | PEPTIDE BINDING PROTEIN               | 1.5       | 15.9    |             |             | -3.    | 10008 | 7.4       |
| 48 | 2g2c   | STRUCTURAL GENOMICS, UNKNOWN FUNCTION | 1.5       | 16.     | MSE,NA      |             | -4.    | 15764 | 13.6      |
| 49 | 1f7l   | TRANSFERASE                           | 1.5       | 16.3    | CA,CL,COA   | ACPS_BACSU  | 6.     | 12138 | 5.2       |
| 50 | 2y7l   | LYASE                                 | 1.5       | 16.5    |             |             | -7.    | 14315 | 10.9      |
| 51 | 2qvg   | TRANSFERASE                           | 1.5       | 16.8    | MSE         |             | -4.    | 13859 | 13.5      |
| 52 | 1fhm   | ELECTRON TRANSPORT                    | 1.5       | 17.2    | FE2         | RUBR_CLOPA  | -8.    | 5520  | 11.6      |
| 53 | 2qsw   | HYDROLASE                             | 1.5       | 17.8    | GOL,MSE,ZN  | METN2_ENTFA | -5.    | 10556 | 11.9      |
| 54 | 1lo7   | HYDROLASE                             | 1.5       | 18.7    | 4CO,EDO     | 4HBT_PSEUC  | 0.     | 15082 | 7.4       |
| 55 | 1ln4   | RNA BINDING PROTEIN                   | 1.5       | 20.6    |             | YHBY_ECOLI  | 1.     | 10112 | 14.2      |
| 56 | 2hx5   | HYDROLASE                             | 1.5       | 21.     | ETX,MSE     | DNCH_PROMM  | -5.    | 16323 | 13.1      |
| 57 | 2w1r   | TRANSCRIPTION                         | 1.5       | 21.7    |             | SP5T_BACSU  | -10.   | 11982 | 14.7      |
| 58 | 1oal   | OXIDOREDUCTASE                        | 1.5       | 23.7    | CU,ZN       | SODC_PHOLE  | -4.    | 14693 | 12.2      |
| 59 | 1y9l   | LIPID BINDING PROTEIN                 | 1.5       | 24.2    | ACT,UND     | MXIM_SHIFL  | 3.     | 12084 | 12.9      |
| 60 | 1x3o   | LIPID TRANSPORT                       | 1.5       | 24.2    |             | ACP_THET8   | -12.   | 8505  | 7.7       |
| 61 | 3dau   | OXIDOREDUCTASE                        | 1.5       | 25.     | MTX,NAP     | DYR_ECOLI   | -10.   | 16515 | 13.8      |
| 62 | 1vmj   | TRANSFERASE                           | 1.52      | 16.8    | NA,SO4      |             | -3.    | 15420 | 5.6       |
| 63 | 2hx0   | DNA BINDING PROTEIN                   | 1.55      | 16.4    | MG,MSE      |             | -4.    | 14002 | 10        |
| 64 | 3osx   | CHAPERONE                             | 1.55      | 19.9    |             |             | -6.    | 19132 | 13        |
| 65 | 2c4w   | LYASE                                 | 1.55      | 26.     | GAJ,GOL,IMD | AROQ_HELPY  | -6.    | 18684 | 6.6       |
| 66 | 5nul   | ELECTRON TRANSPORT                    | 1.6       | 11.6    | FMN         | FLAV_CLOBE  | -16.   | 14908 | 11.5      |
| 67 | 2asf   | STRUCTURAL GENOMICS, UNKNOWN FUNCTION | 1.6       | 11.8    | CIT,MSE,NA  | Y2074_MYCTU | 0.     | 12759 | 5.3       |
| 68 | 1u84   | STRUCTURAL GENOMICS, UNKNOWN FUNCTION | 1.6       | 13.7    | EDO,GOL     |             | -4.    | 8483  | 11.9      |
| 69 | 3gwi   | Hydrolase                             | 1.6       | 14.8    | SO4         | ATMA_ECOLI  | -6.    | 17355 | 5.6       |
| 70 | 1a3c   | TRANSCRIPTION REGULATION              | 1.6       | 16.7    | SM,SO4      | PYRR_BACSU  | -4.    | 18168 | 9.7       |
| 71 | 2o1a   | SURFACE ACTIVE PROTEIN                | 1.6       | 18.8    | EDO,MSE,SO4 | ISDA_STAAM  | 3.     | 14303 | 10.2      |
| 72 | 1cuo   | ELECTRON TRANSPORT                    | 1.6       | 19.2    | CU          | AZUR2_METJ  | -1.    | 12862 | 11.5      |
| 73 | 2w3w   | OXIDOREDUCTASE                        | 1.6       | 20.6    | NDP,VG9     |             | -2.    | 17283 | 13.8      |
| 74 | 2x5p   | PROTEIN BINDING                       | 1.6       | 21.8    |             |             | -5.    | 10379 | 8         |
| 75 | 1id0   | TRANSFERASE                           | 1.6       | 23.2    | ANP,MG      | PHOQ_ECOLI  | -8.    | 16220 | 8.9       |
| 76 | 2in0   | HYDROLASE                             | 1.6       | 23.3    |             | RECA_MYCTU  | -2.    | 14295 | 7.9       |
| 77 | 1gvp   | DNA-BINDING PROTEIN                   | 1.6       | 30.9    |             | G5P_BPF1    | 3.     | 9140  | 11.8      |
| 78 | 1pzs   | oxidoreductase, metal binding protein | 1.63      | 15.     | CU          | SODC_MYCTU  | -4.    | 16154 | 14.5      |
| 79 | 2i6v   | PROTEIN TRANSPORT, MEMBRANE PROTEIN   | 1.63      | 16.     |             | GSPC_VIBCH  | -7.    | 9392  | 7         |
| 80 | 1gny   | CARBOHYDRATE-BINDING MODULE           | 1.63      | 17.7    | NA,XYP      |             | -14.   | 14871 | 6.2       |
| 81 | 3i4q   | HYDROLASE                             | 1.63      | 19.1    | MSE,NA      |             | -12.   | 18710 | 13.6      |
| 82 | 1h98   | ELECTRON TRANSPORT                    | 1.64      | 18.     | F3S,SF4     | FER_THET8   | -9.    | 7981  | 13.6      |
| 83 | 1j7g   | HYDROLASE                             | 1.64      | 23.3    |             | DTD_HAEIN   | -1.    | 14709 | 5.4       |
| 84 | 3bn7   | UNKNOWN FUNCTION                      | 1.64      | 25.9    | ACT,MSE     |             | 0.     | 11532 | 5.8       |
| 85 | 1cxy   | ELECTRON TRANSPORT                    | 1.65      | 19.5    | HEM         | CYB5_ECTVA  | -5.    | 8484  | 13.1      |
| 86 | 2a9o   | SIGNALING PROTEIN                     | 1.65      | 23.2    | BEF,MN      |             | -5.    | 12476 | 13.4      |

| No  | PDB ID   | PDB HEAD                              | Res       | Bfactor | Heteroatoms      | Swiss ID   | Charge | Mass  | Dist (NC) |
|-----|----------|---------------------------------------|-----------|---------|------------------|------------|--------|-------|-----------|
| 87  | 1wub     | LIPID BINDING PROTEIN                 | 1.65      | 23.3    | OTP              |            | -5.    | 17889 | 8.3       |
| 88  | 3bs3     | DNA BINDING PROTEIN                   | 1.65      | 29.2    | EDO,MSE,SO4      |            | 4.     | 7935  | 8.6       |
| 89  | 1qjp     | OUTER MEMBRANE                        | 1.65      | 39.2    | C8E              | OMPA_ECOLI | -1.    | 14473 | 10.7      |
| 90  | 3s6m     | ISOMERASE                             | 1.65<br>1 | 15.     |                  |            | -5.    | 16596 | 12.1      |
| 91  | 3a0u     | SIGNALING PROTEIN                     | 1.66      | 14.     | BEF,MG,PG4       |            | -7.    | 12730 | 10.8      |
| 92  | 3kp8     | OXIDOREDUCTASE                        | 1.66      | 18.8    |                  |            | -3.    | 9326  | 13.6      |
| 93  | 3t1s     | SIGNALING PROTEIN                     | 1.67      | 23.3    |                  |            | -5.    | 14503 | 4.4       |
| 94  | 3h1g     | SIGNALING PROTEIN                     | 1.7       | 7.7     |                  | CHEY_HELPY | -2.    | 12736 | 7.9       |
| 95  | 1j27     | structural genomics, unknown function | 1.7       | 11.6    |                  |            | 1.     | 10753 | 5.8       |
| 96  | 1ctf     | RIBOSOMAL PROTEIN                     | 1.7       | 14.3    | SO4              | RL7_ECOLI  | -2.    | 6408  | 8.8       |
| 97  | 1fxd     | ELECTRON TRANSFER(IRON-SULFUR)        | 1.7       | 16.     | F3S,SCH          | FER_DESGI  | -15.   | 5894  | 5.2       |
| 98  | 1czn     | ELECTRON TRANSPORT                    | 1.7       | 17.2    | FMN              | FLAV_SYNE7 | -17.   | 17387 | 11.8      |
| 99  | 1h75     | ELECTRON TRANSPORT                    | 1.7       | 20.6    |                  | NRDH_ECOLI | 1.     | 8241  | 13.2      |
| 100 | 1df7     | OXIDOREDUCTASE                        | 1.7       | 21.4    | GOL,MTX,NDP,S O4 | DYR_MYCTU  | -1.    | 16407 | 9.9       |
| 101 | 3gw<br>m | TRANSFERASE                           | 1.7       | 22.2    |                  | ACPS_MYCS2 | -4.    | 14114 | 5.8       |
| 102 | 1wka     | LIGASE                                | 1.7       | 24.4    |                  | SYV_THETH  | -6.    | 15011 | 5.5       |
| 103 | 1nza     | structural genomics, unknown function | 1.7       | 25.1    | CL,GOL,NA,SO4    | CUTA_THET8 | -5.    | 10765 | 12.6      |
| 104 | 1tuv     | UNKNOWN FUNCTION                      | 1.7       | 26.     | VK3              | YGIN_ECOLI | -4.    | 10595 | 12.3      |
| 105 | 2g0c     | HYDROLASE                             | 1.7       | 29.1    | SO4              | DBPA_BACSU | 3.     | 7297  | 7.5       |
| 106 | 2eg2     | SIGNALING PROTEIN                     | 1.72      | 20.9    | ATP,CL           | GLNB_AQUAE | -2.    | 9732  | 8.8       |
| 107 | 2huj     | STRUCTURAL GENOMICS, UNKNOWN FUNCTION | 1.74      | 31.9    | MSE              |            | -3.    | 14052 | 13.8      |
| 108 | 3hgb     | OXIDOREDUCTASE                        | 1.75      | 10.1    |                  | GCSH_MYCTU | -16.   | 13372 | 12.2      |
| 109 | 1chd     | CARBOXYL METHYLESTERASE               | 1.75      | 12.3    |                  | CHEB_SALTY | 1.     | 19467 | 8.5       |
| 110 | 1o3u     | UNKNOWN FUNCTION                      | 1.75      | 17.4    | MSE              |            | -7.    | 12899 | 12.8      |
| 111 | 1uj8     | STRUCTURAL GENOMICS, UNKNOWN FUNCTION | 1.75      | 17.5    |                  | ISCX_ECOLI | -12.   | 7949  | 14.7      |
| 112 | 1vjw     | OXIDOREDUCTASE                        | 1.75      | 18.7    | SF4              | FER_THEMA  | -6.    | 5634  | 5.3       |
| 113 | 3bv8     | TRANSFERASE                           | 1.75      | 20.5    | GOL,MSE,NA       | DAPH_STAAM | -7.    | 10608 | 11.8      |
| 114 | 1ysq     | GENE REGULATION                       | 1.75      | 25.9    | PO4              | YIAJ_ECOLI | -6.    | 18710 | 10.6      |
| 115 | 1vr8     | SIGNALING PROTEIN                     | 1.75      | 26.7    | AZI,GOL,MSE      |            | 3.     | 14652 | 8.4       |
| 116 | 3klb     | FLAVOPROTEIN                          | 1.75      | 27.3    |                  |            | -2.    | 17993 | 5.3       |
| 117 | 3qy3     | HYDROLASE                             | 1.75      | 32.2    |                  |            | -6.    | 14050 | 10.4      |
| 118 | 1nps     | SIGNALING PROTEIN                     | 1.8       | 9.3     | CA               | DESS_MYXXA | -4.    | 8701  | 11.4      |
| 119 | 1lop     | COMPLEX (ISOMERASE/PEPTIDE)           | 1.8       | 13.9    | NIT,SIN          | PIIB_ECOLI | -6.    | 17226 | 5.4       |
| 120 | 1bdo     | TRANSFERASE                           | 1.8       | 14.     | BTN              | BCCP_ECOLI | -5.    | 8177  | 13.2      |
| 121 | 1jwq     | HYDROLASE                             | 1.8       | 15.2    | ZN               |            | 1.     | 17983 | 13.1      |
| 122 | 2o0q     | STRUCTURAL GENOMICS, UNKNOWN FUNCTION | 1.8       | 18.2    |                  |            | -8.    | 11495 | 12.3      |
| 123 | 2pln     | SIGNALING PROTEIN                     | 1.8       | 20.2    | MSE              |            | -4.    | 12423 | 13        |
| 124 | 3ls0     | PHOTOSYNTHESIS                        | 1.8       | 20.6    |                  |            | -1.    | 11916 | 9.5       |
| 125 | 1bxv     | COPPER PROTEIN                        | 1.8       | 20.9    | CU               | PLAS_SYNE7 | -6.    | 9178  | 13        |
| 126 | 2cvb     | STRUCTURAL GENOMICS, UNKNOWN FUNCTION | 1.8       | 21.7    | MSE              |            | -8.    | 19832 | 3.9       |
| 127 | 2qr3     | TRANSCRIPTION                         | 1.8       | 23.9    |                  |            | -4.    | 12606 | 13.4      |
| 128 | 1v2z     | circadian clock protein               | 1.8       | 24.     |                  | KAIA_THEVL | -2.    | 11654 | 7.1       |
| 129 | 1zuh     | Transferase                           | 1.8       | 25.7    |                  | AROK_HELPY | -2.    | 15792 | 13        |
| 130 | 3pzy     | BIOSYNTHETIC PROTEIN                  | 1.8       | 26.6    |                  |            | -4.    | 13835 | 13.5      |

| No  | PDB ID | PDB HEAD                              | Res       | Bfactor | Heteroatoms   | Swiss ID   | Charge | Mass  | Dist (NC) |
|-----|--------|---------------------------------------|-----------|---------|---------------|------------|--------|-------|-----------|
| 131 | 2qni   | STRUCTURAL GENOMICS, UNKNOWN FUNCTION | 1.8       | 27.4    | MSE           |            | -6.    | 19826 | 13.2      |
| 132 | 2j22   | CARBOHYDRATE-BINDING PROTEIN          | 1.8       | 28.6    | CA,GOL        |            | -7.    | 14447 | 5.5       |
| 133 | 2b8i   | LIPID BINDING PROTEIN                 | 1.8       | 30.     |               |            | -5.    | 7951  | 9.4       |
| 134 | 1s7i   | STRUCTURAL GENOMICS, UNKNOWN FUNCTION | 1.8       | 33.1    |               |            | -4.    | 12660 | 9.8       |
| 135 | 3lqn   | Structural Genomics, Unknown function | 1.8       | 36.5    |               |            | -5.    | 16141 | 10.1      |
| 136 | 1ku3   | TRANSCRIPTION                         | 1.8       | 38.2    |               |            | 3.     | 6368  | 14.4      |
| 137 | 3qra   | CELL INVASION                         | 1.80<br>1 | 33.6    |               |            | 1.     | 15458 | 9.4       |
| 138 | 3q1h   | OXIDOREDUCTASE                        | 1.80<br>4 | 20.2    |               |            | -10.   | 17453 | 14.9      |
| 139 | 2ewt   | DNA BINDING PROTEIN                   | 1.81      | 13.9    | SO4           |            | 2.     | 7255  | 11.8      |
| 140 | 3bci   | oxidoreductase                        | 1.81      | 33.1    |               |            | 3.     | 18346 | 13.5      |
| 141 | 1m6t   | ELECTRON TRANSPORT                    | 1.81      | 36.6    | SO4           | C562_ECOLX | -4.    | 10929 | 13.7      |
| 142 | 2cgg   | PROTEIN TRANSPORT                     | 1.83      | 29.5    |               |            | -7.    | 7969  | 11.7      |
| 143 | 2xht   | SUGAR BINDING PROTEIN                 | 1.83<br>2 | 29.5    |               |            | -1.    | 15986 | 9.6       |
| 144 | 3fxh   | STRUCTURAL GENOMICS, UNKNOWN FUNCTION | 1.83<br>7 | 38.5    | MSE           |            | -4.    | 12060 | 13.7      |
| 145 | 3nph   | PHOTOSYNTHESIS                        | 1.84<br>9 | 24.7    |               |            | -7.    | 14341 | 13.6      |
| 146 | 3sny   | METAL BINDING PROTEIN                 | 1.85      | 14.6    |               |            | -2.    | 9094  | 12.6      |
| 147 | 2aan   | ELECTRON TRANSPORT                    | 1.85      | 18.8    | CU,SO4        | AURA_CHLAA | -4.    | 11877 | 14        |
| 148 | 2fwt   | ELECTRON TRANSPORT                    | 1.85      | 22.6    | HEM           |            | -3.    | 10961 | 9         |
| 149 | 2gw8   | SIGNALING PROTEIN                     | 1.85      | 27.     |               |            | -2.    | 9960  | 12.7      |
| 150 | 2o4d   | UNKNOWN FUNCTION                      | 1.85      | 28.8    | MSE           |            | -4.    | 15273 | 7.3       |
| 151 | 2qpz   | METAL BINDING PROTEIN                 | 1.85      | 31.7    | FES           | NDOA_PSEPU | -8.    | 10859 | 5.6       |
| 152 | 3enu   | STRUCTURAL PROTEIN                    | 1.86      | 9.8     |               |            | -1.    | 12034 | 13.3      |
| 153 | 1o50   | TRANSFERASE                           | 1.87      | 38.4    |               |            | -6.    | 14994 | 8.4       |
| 154 | 1u2p   | HYDROLASE                             | 1.9       | 13.6    | CL            | PTPA_MYCTU | -4.    | 16006 | 11.5      |
| 155 | 2ywd   | TRANSFERASE                           | 1.9       | 18.     |               | PDXT_THET8 | -5.    | 19400 | 10.1      |
| 156 | 3dml   | OXIDOREDUCTASE                        | 1.9       | 18.2    | MSE           |            | -6.    | 10863 | 10.7      |
| 157 | 2pii   | SIGNAL TRANSDUCTION PROTEIN           | 1.9       | 18.8    |               | GLNB_ECOLI | -3.    | 11509 | 5.2       |
| 158 | 2cdn   | TRANSFERASE                           | 1.9       | 20.8    | ADP,MG        | KAD_MYCTU  | -5.    | 18936 | 8.3       |
| 159 | 1xhd   | TRANSFERASE                           | 1.9       | 20.9    | MSE,SO4       |            | -2.    | 18364 | 5.9       |
| 160 | 2p1l   | TRANSCRIPTIONAL REGULATOR             | 1.9       | 23.4    | BEF,MG,MSE,PT | PHOP_ECOLI | -10.   | 13002 | 13.2      |
| 161 | 1r1m   | MEMBRANE PROTEIN                      | 1.9       | 24.5    | TRS           | OMP4_NEIMA | 4.     | 14235 | 7.5       |
| 162 | 1q8b   | Structural Genomics, Unknown Function | 1.9       | 24.7    | MSE           | YJCS_BACSU | -6.    | 10562 | 3.8       |
| 163 | 1gui   | CARBOHYDRATE BINDING MODULE           | 1.9       | 25.1    | BGC,CA,GOL    |            | -13.   | 16474 | 13        |
| 164 | 1tmy   | CHEMOTAXIS                            | 1.9       | 32.     |               | CHEY_THEMA | 0.     | 11980 | 7         |
| 165 | 3onp   | TRANSFERASE                           | 1.9       | 38.6    |               |            | 1.     | 18114 | 13.9      |
| 166 | 1tuw   | UNKNOWN FUNCTION                      | 1.9       | 38.7    | SO4           | TCML_STRGA | -9.    | 11205 | 14.2      |
| 167 | 3le0   | BLOOD CLOTTING                        | 1.91      | 24.5    |               |            | -3.    | 14647 | 7.9       |
| 168 | 3i7t   | UNKNOWN FUNCTION                      | 1.93      | 9.3     |               |            | -2.    | 11567 | 13.9      |
| 169 | 1opc   | TRANSCRIPTION REGULATION              | 1.95      | 22.9    |               | OMPR_ECOLI | 1.     | 10629 | 13.2      |
| 170 | 3hqj   | TRANSFERASE                           | 1.95      | 24.1    | COA,MG        | ACPS_MYCTU | -3.    | 11319 | 6.4       |
| 171 | 1jrl   | HYDROLASE                             | 1.95      | 29.     | IMD,SO4       | TESA_ECOLI | -1.    | 18556 | 12.1      |
| 172 | 2bbe   | STRUCTURAL GENOMICS, UNKNOWN FUNCTION | 1.97      | 13.6    | SO4           |            | -5.    | 11900 | 6.2       |

| No  | PDB ID | PDB HEAD                              | Res  | Bfactor | Heteroatoms | Swiss ID    | Charge | Mass  | Dist (NC) |
|-----|--------|---------------------------------------|------|---------|-------------|-------------|--------|-------|-----------|
| 173 | 2z2i   | HYDROLASE                             | 1.98 | 31.7    |             | PTH_MYCTU   | 6.     | 17601 | 11.1      |
| 174 | 1f3z   | PHOSPHOTRANSFERASE                    | 1.98 | 37.8    | ZN          | PTGA_ECOLI  | -10.   | 14559 | 6.8       |
| 175 | 1dur   | ELECTRON TRANSPORT                    | 2.   | 12.2    | SF4         | FER_PEPAS   | -7.    | 5180  | 9.1       |
| 176 | 1i1o   | ELECTRON TRANSPORT                    | 2.   | 13.3    | FMN         | FLAV_DESVH  | -19.   | 14895 | 11        |
| 177 | 2b45   | HYDROLASE                             | 2.   | 15.     | EPE         | XYNA_BACSU  | 2.     | 19060 | 7.2       |
| 178 | 3gce   | OXIDOREDUCTASE                        | 2.   | 17.8    | FES         |             | -9.    | 10309 | 12.2      |
| 179 | 3f2v   | structural genomics, unknown function | 2.   | 18.     | FMN         |             | 0.     | 18320 | 9.6       |
| 180 | 1tig   | RIBOSOME BINDING FACTOR               | 2.   | 18.9    |             | IF3_BACST   | 5.     | 9428  | 9.4       |
| 181 | 1spv   | STRUCTURAL GENOMICS, UNKNOWN FUNCTION | 2.   | 20.9    | MES,MSE     | YMDB_ECOLI  | -5.    | 17056 | 12.9      |
| 182 | 3dcm   | TRANSFERASE                           | 2.   | 23.3    | SAM         | Y1570_THEMA | -3.    | 19903 | 10.2      |
| 183 | 2fw5   | ELECTRON TRANSPORT                    | 2.   | 24.7    | HEM         |             | -2.    | 12198 | 10.4      |
| 184 | 1o22   | UNKNOWN FUNCTION                      | 2.   | 26.1    | MSE         |             | -7.    | 16453 | 5.7       |
| 185 | 1eso   | OXIDOREDUCTASE                        | 2.   | 28.     | CU,ZN       | SODC_ECOLI  | -6.    | 14639 | 13.3      |
| 186 | 1mjc   | TRANSCRIPTION REGULATION              | 2.   | 29.5    |             | CSPA_ECOLI  | -1.    | 6772  | 14.3      |
| 187 | 2hp7   | Signaling Protein                     | 2.   | 29.8    |             |             | -10.   | 19165 | 14.5      |
| 188 | 3hz7   | STRUCTURAL GENOMICS, UNKNOWN FUNCTION | 2.   | 31.9    | MSE,SX      |             | -5.    | 7423  | 7.7       |
| 189 | 1mi8   | Hydrolase                             | 2.   | 32.1    |             | DNAB_SYNY3  | 0.     | 14553 | 4.4       |
| 190 | 2vjw   | HYDROLASE                             | 2.   | 32.5    | MSE         |             | -8.    | 13300 | 12.1      |
| 191 | 1vku   | BIOSYNTHETIC PROTEIN                  | 2.   | 33.4    | MSE         |             | -10.   | 9275  | 13.6      |
| 192 | 2es9   | STRUCTURAL GENOMICS, UNKNOWN FUNCTION | 2.   | 36.2    | MSE         |             | -4.    | 10401 | 8         |
| 193 | 3cp3   | STRUCTURAL GENOMICS, UNKNOWN FUNCTION | 2.   | 37.9    | ACY         |             | -4.    | 14553 | 8.1       |

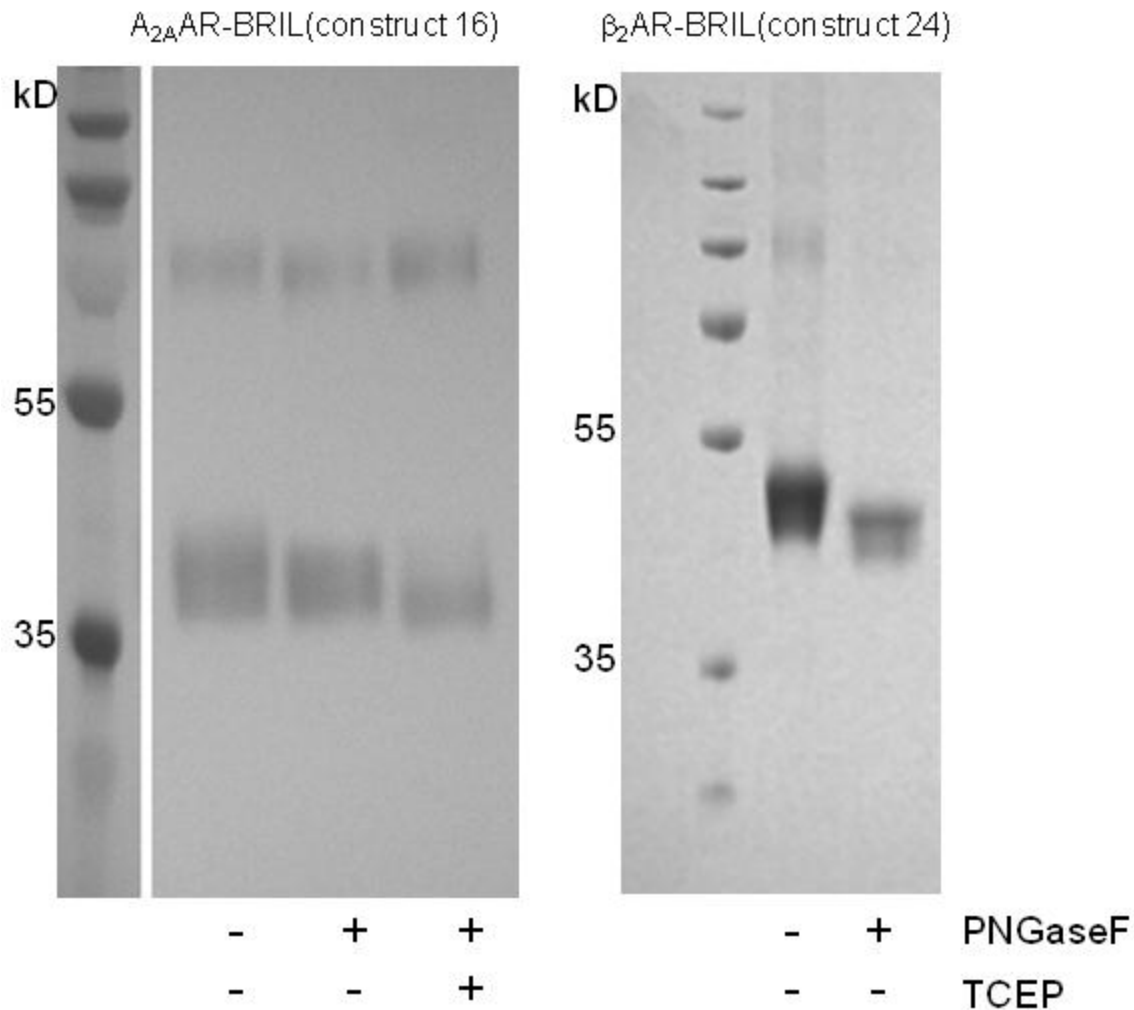

**Figure S1: Deglycosylation experiments to test that multiple gel bands are due to different glycosylation states of the receptor, related to figure 3.**  $\alpha$ -FLAG western is shown. Using  $A_{2A}AR$ -BRIL (construct 16) and  $\beta_2AR$ -BRIL (construct 24) as representative examples, multiple gel bands can be consolidated by the incubation of protein with PNGaseF overnight, and in the case of  $A_{2A}AR$ , with the further addition of tris(2-carboxyethyl)phosphine (TCEP) upon gel loading.



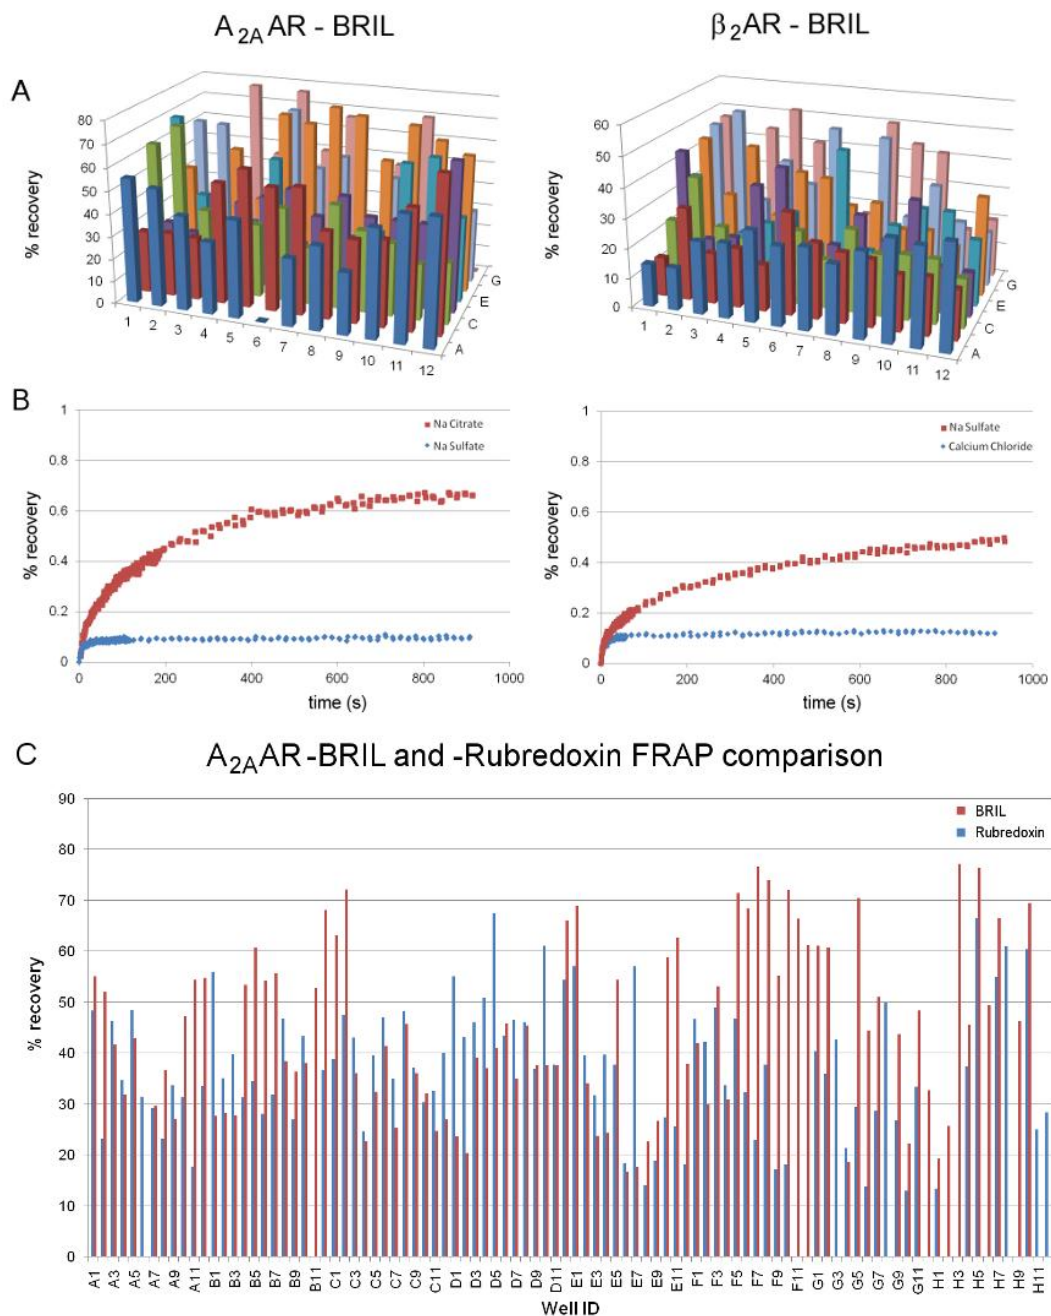

**Figure S2: FRAP experiments were carried out for  $A_{2A}AR$ -BRIL and  $\beta_2AR$ -BRIL to assay for diffusion, related to figure 7. (A) High throughput FRAP analysis showing good diffusion recovery in homemade salt screens at pH 5.0 and pH 7.0 for  $A_{2A}AR$ -BRIL and  $\beta_2AR$ -BRIL, respectively. (B) Representative full FRAP experiments showing conditions providing high and low diffusion recovery for  $A_{2A}AR$ -BRIL and  $\beta_2AR$ -BRIL for comparison. (C) FRAP comparison of  $A_{2A}AR$ -rubredoxin (construct 7) and  $A_{2A}AR$ -BRIL (construct 16). Over several conditions,  $A_{2A}AR$ -BRIL in general showed higher diffusion recovery than  $A_{2A}AR$ -rubredoxin.**
